# Supplementary material
Source: Research Square preprint supplement (doi:10.21203/rs.3.rs-9180606/v1)
Supplement: Supplementary file 1 [file cf74e6e3712941d4f5fa8b6a.docx]

Table 1. Average effective moisture diffusivity and activation energy at various drying conditions

| Drying Temp, (⁰C) | Moisture Diffusivity  Deff avg (m2/s) | Average Activation energy, (kJ/mol) | R2 |
| --- | --- | --- | --- |
| 40 | 1.859*10-8 | 35675.374 | 0.94 |
| 50 | 2.219*10-8 |
| 60 | 4.182*10-8 |
| 65 | 4.777*10-8 |

Table 2. Total 6-gingerol content of experimental dried ginger samples.

| Drying Temperature  ( ⁰C) | 6-gingerol content  (g/ 100g) | Retention  % (db) |
| --- | --- | --- |
| 40 | 0.6083 | 48.696 |
| 50 | 0.6833 | 54.707 |
| 60 | 0.5678 | 45.455 |
| 65 | 0.6082 | 48.694 |
| Fresh ginger samples were found with average 1.249 percentage of 6-ginerol | | |
